# Supplementary material for: Intraoperative Use of Wide-Field Optical Coherence Tomography to Evaluate Tissue Microstructure in the Oral Cavity and Oropharynx
Source: PubMed Central journal article supplement — JAMA Otolaryngol Head Neck Surg. 2022 Dec 1;149(1):71–8. doi: 10.1001/jamaoto.2022.3763 (PMC9856682; doi:10.1001/jamaoto.2022.3763), 2022-12-01
Supplement: jamaotolaryngolheadnecksurg-e223763-s001.pdf [file jamaotolaryngolheadnecksurg-e223763-s001.pdf]

## Supplemental Online Content

Badhey AK, Schwarz JS, Laitman BM, et al. Intraoperative use of wide-field optical coherence tomography to evaluate tissue microstructure in the oral cavity and oropharynx. *JAMA Otolaryngol Head Neck Surg*. Published online December 1, 2022. doi:10.1001/jamaoto.2022.3763

**eTable.** Lesion Tissue Origin

**eFigure 1.** Left Buccal Tissue

**eFigure 2.** Base of Tongue, View 1

**eFigure 3.** Base of Tongue, View 2

**eFigure 4.** Left Lateral Tongue

**eFigure 5.** Right Lateral Tongue, View 1

**eFigure 6.** Right Lateral Tongue, View 2

This supplemental material has been provided by the authors to give readers additional information about their work.

**eTable.** Lesion Tissue Origin<sup>a</sup>

| Tissue              | No. of patients | No. of specimens |
|---------------------|-----------------|------------------|
| Tonsillar           | 28              | 42               |
| Buccal              | 4               | 4                |
| Tongue              | 16              | 17               |
| Mandible            | 3               | 3                |
| Soft Palate         | 1               | 1                |
| Uvula               | 1               | 1                |
| Parapharyngeal mass | 1               | 1                |

<sup>a</sup>Data are presented as either mean  $\pm$  SD or N(%) unless otherwise noted.

# eFigure 1. Left Buccal Tissue

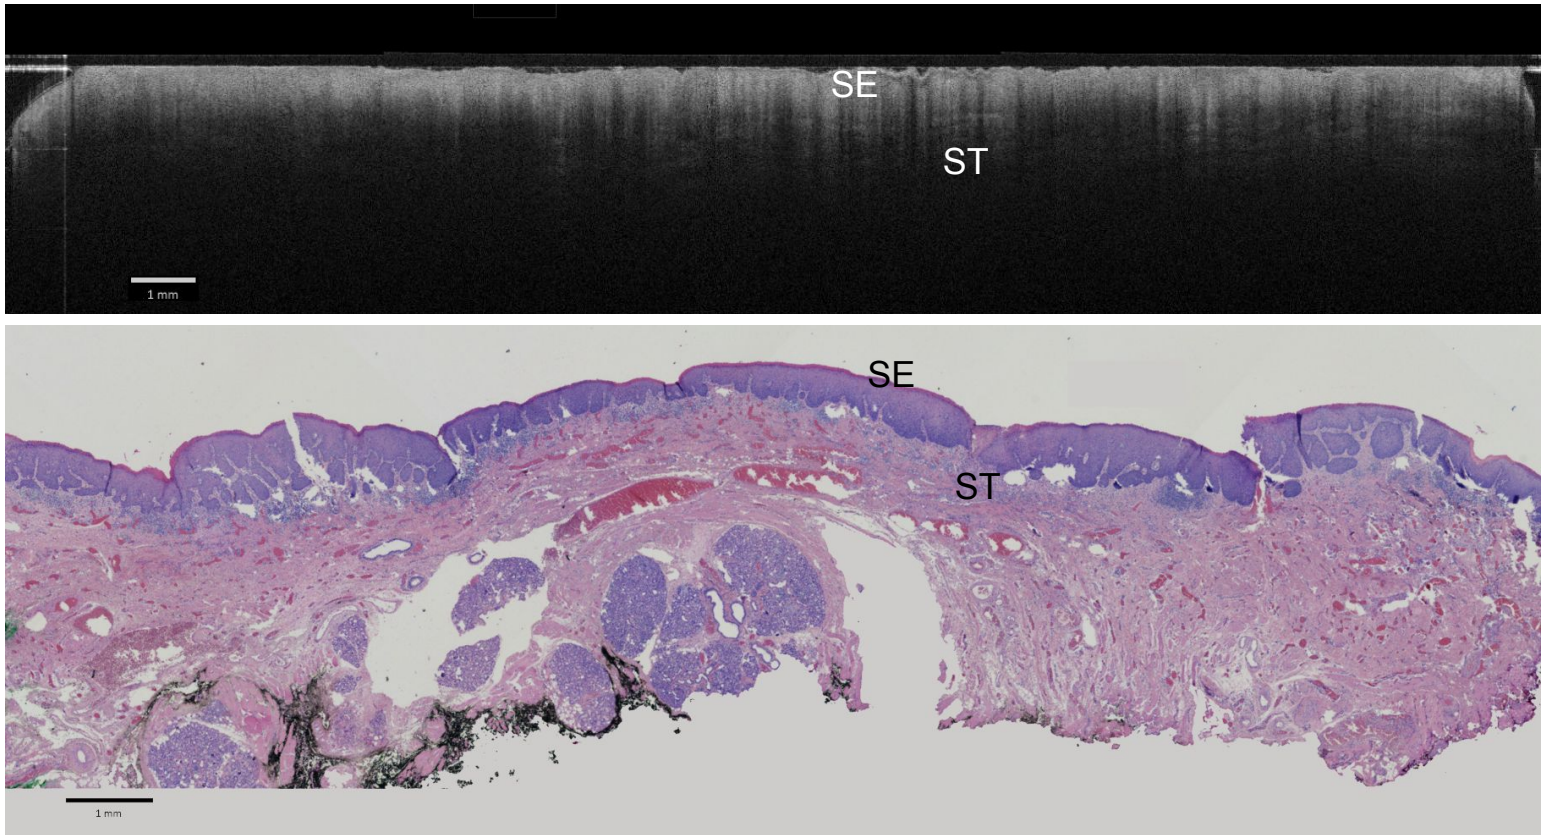

Male, age 60. Superficial margin. SE, squamous epithelium; ST, submucosal tissue.

## eFigure 2. Base of Tongue, View 1

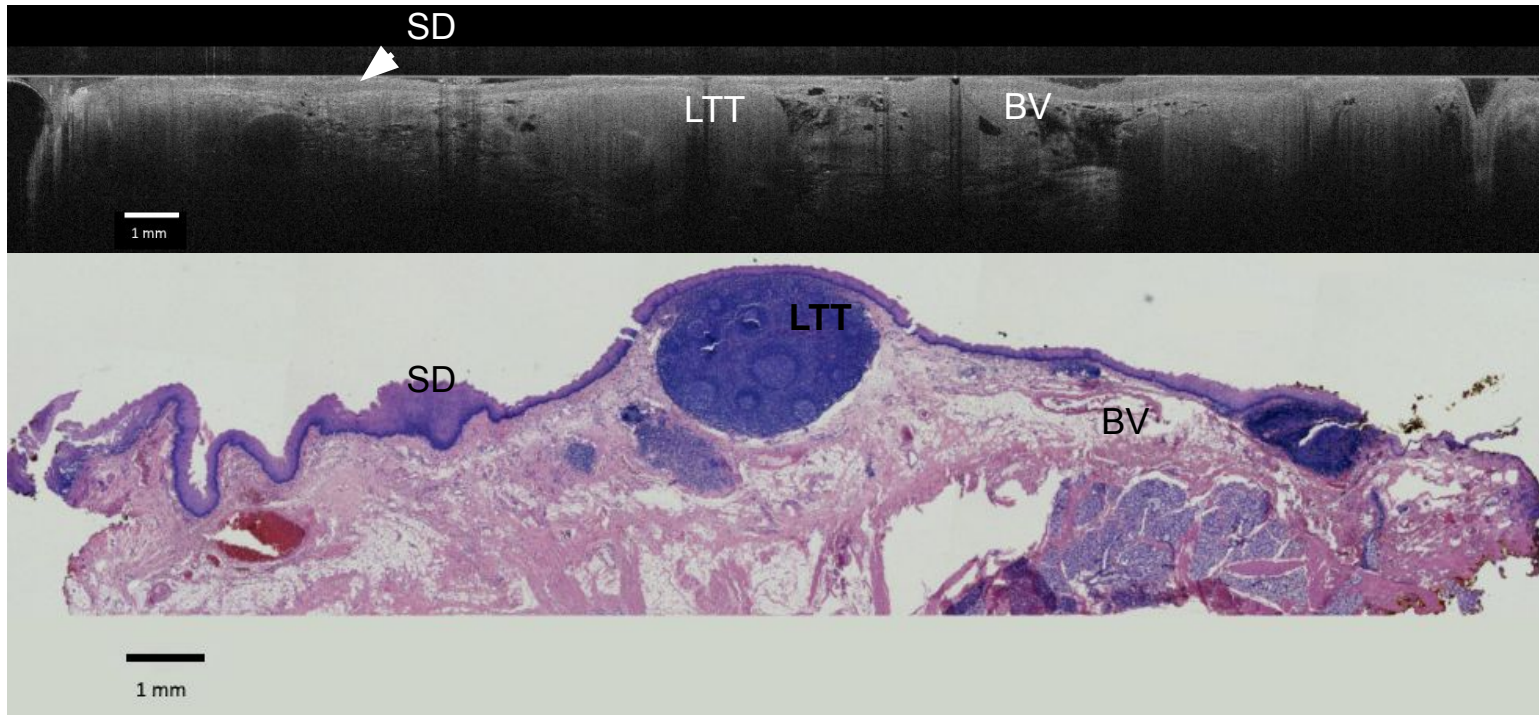

Male, age 68. Superficial margin. BV, blood vessel; LTT, lingual tonsillar tissue SD, squamous dysplasia.

## eFigure 3. Base of Tongue, View 2

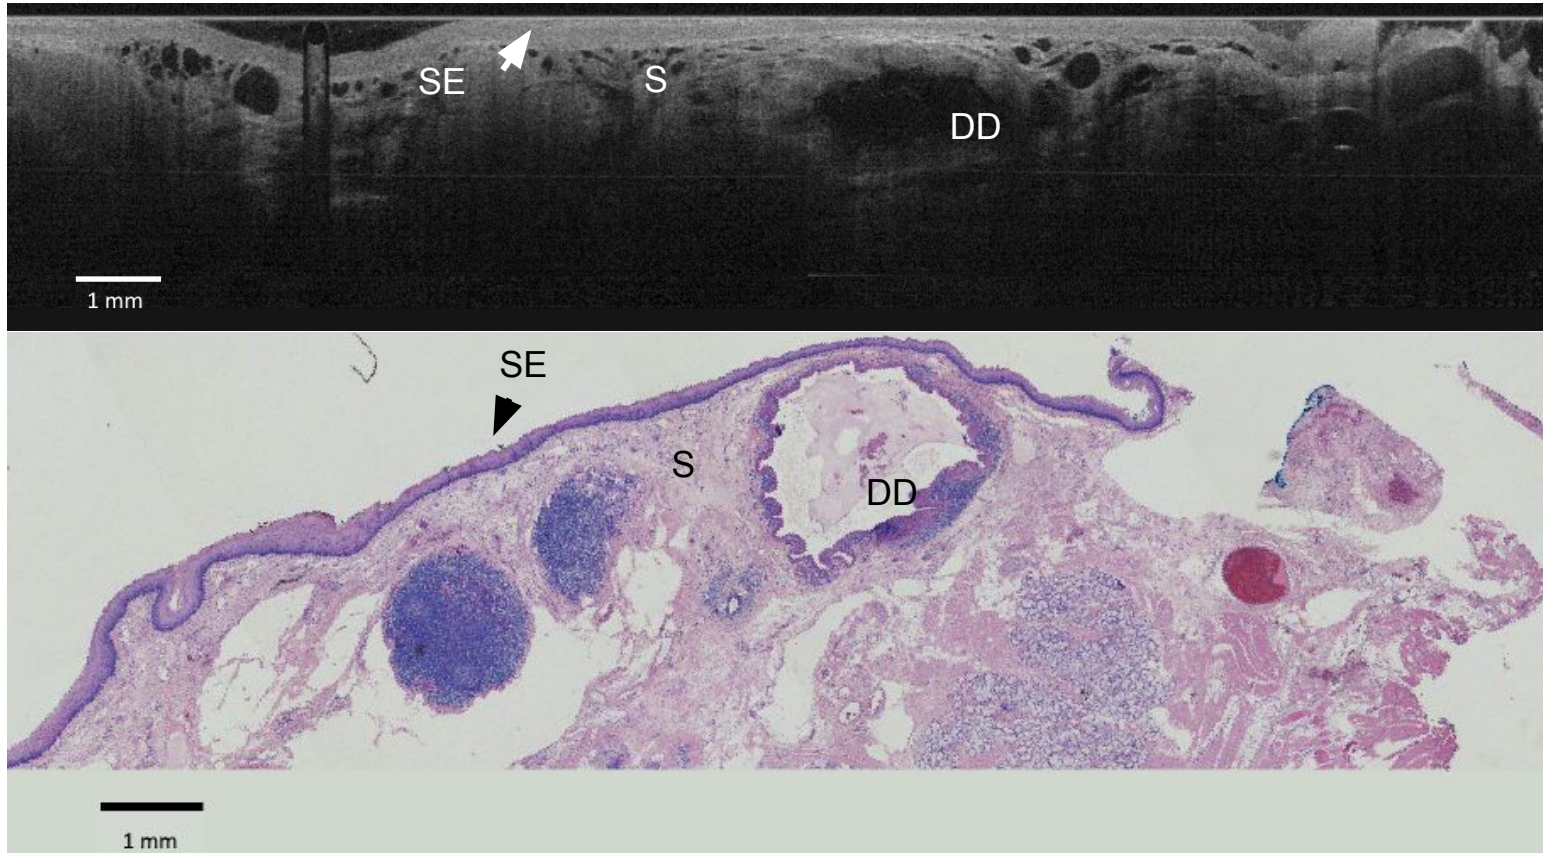

Male, age 68. Superficial margin. DD, dilated duct; S, submucosal layer; SE, squamous epithelium.

# eFigure 4. Left Lateral Tongue

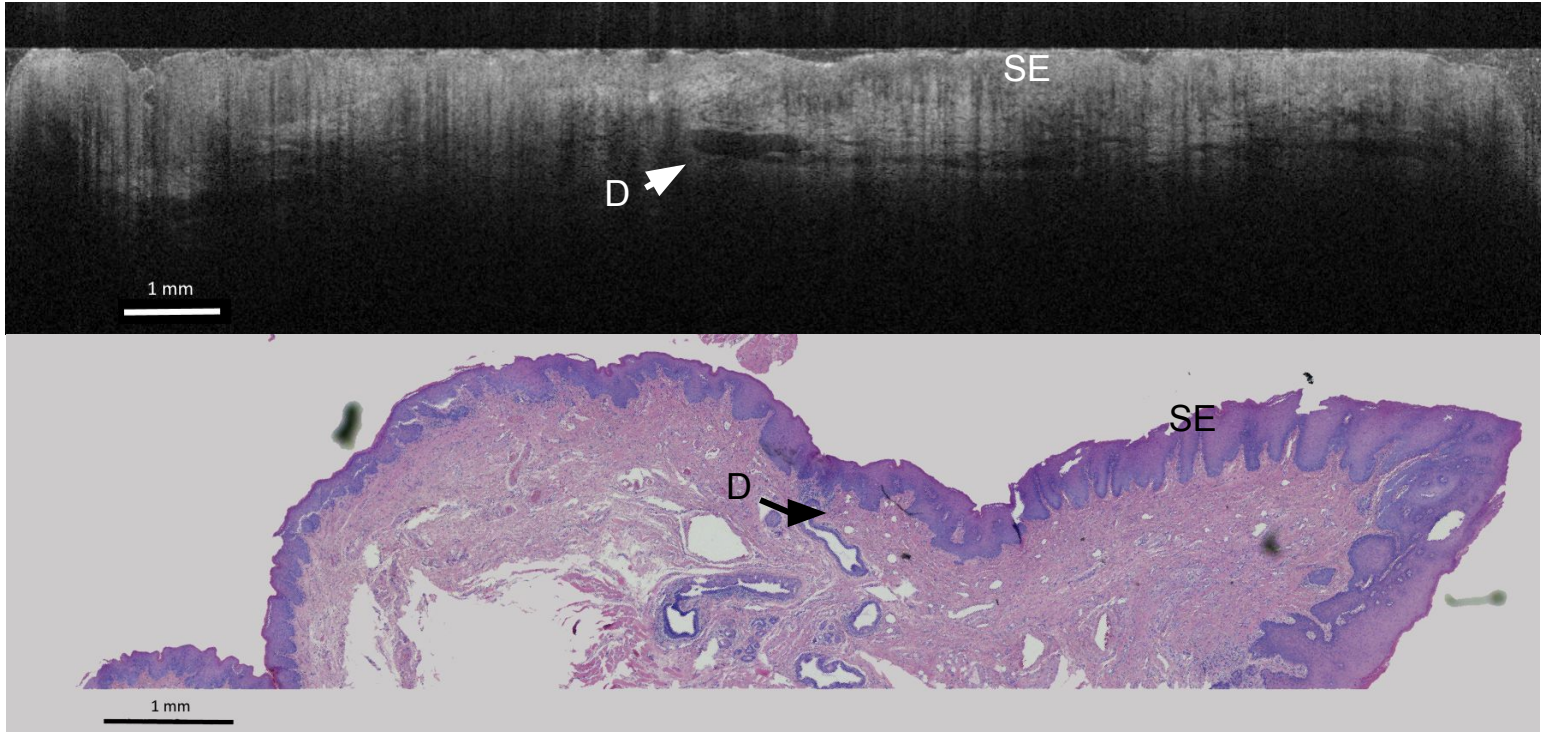

Female, age 75. Superficial margin. D, duct; SE, squamous epithelium.

# eFigure 5. Right Lateral Tongue, View 1

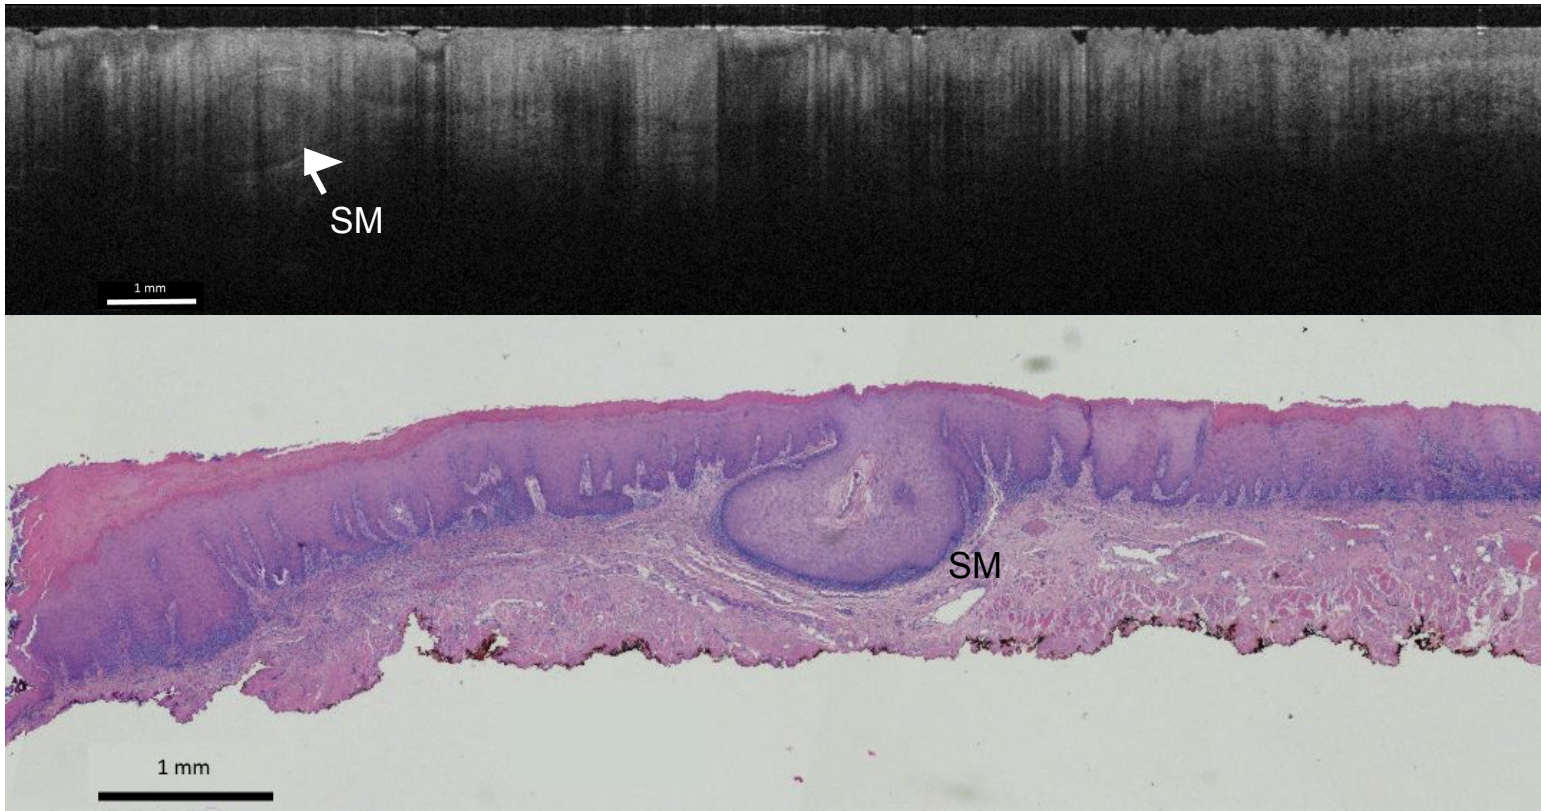

Female, age 55. Superficial margin. OCT b-scan and histology slide are perpendicular to one another. SM, squamous metaplasia.

## eFigure 6. Right Lateral Tongue, View 2

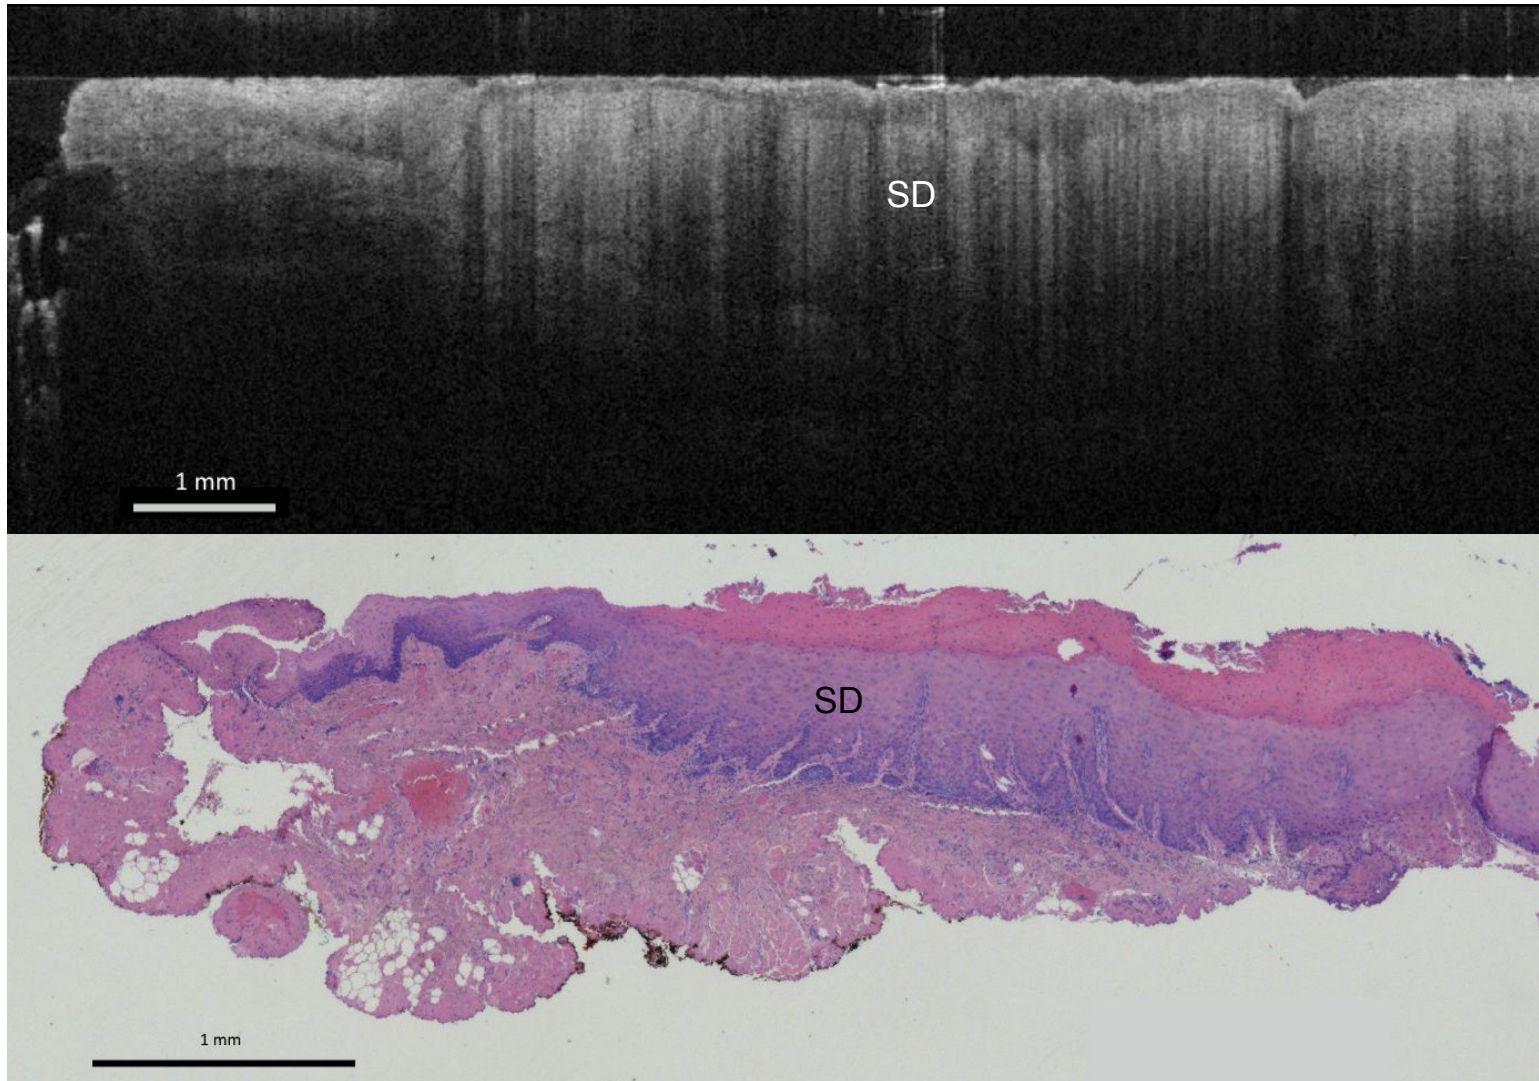

Female, age 55. Superficial margin. OCT b-scan and histology slide are perpendicular to one another. SD, squamous dysplasia.
